# Supplementary material
Source: ML conference proceedings conference paper supplement (https://openreview.net/forum?id=xgrZkRHliXR)
Supplement: supplementary_material [file attachment]

## A Environment Details

Here we provide additional details for our simulation environments. An unabridged version of the description from Section 5 is as follows:

- **Push (2D)**: Push a round puck using the tool such that it stops at the specified goal location. The goal space is a subset of 2D final puck locations  $\mathcal{G} \subset \mathbb{R}^2$ , and the control action space  $\mathcal{A}_C \in \mathbb{R}^2$  specifies the  $x$  and  $y$  tool velocities.
- **Catch balls (2D)**: Use the tool to catch three balls that fall from the sky. The agent’s goal is to catch all three balls, which start from varying locations on the  $x$ - $y$  plane. We use a 1-dimensional control action space that specifies the  $x$  velocity of the tool at each step.
- **Scoop (2D)**: Use the tool to scoop balls out of a reservoir containing 40 total balls. Here we specify goals of scooping  $x \in \{1, 2, \dots, 7\}$  balls. The control action space  $\mathcal{A}_C \in \mathbb{R}^3$  specifies the velocity of the rigid tool in  $x$  and  $y$  directions, along with its angular velocity.
- **Fetch cube (3D)**: Use the tool to retrieve an object randomly positioned beneath a vertical overhang. This task is additionally challenging because the position of the robot end effector is restricted to a rectangular region in the  $x$ - $y$  plane of dimensions  $0.8\text{m} \times 0.2\text{m}$  to avoid collision with the overhang. The tool is a three-link chain where each link is a box parameterized by its width, length, and height. The design space also includes the relative angle between two connected links, with a total of  $n = 11$  parameters. The control action space  $\mathcal{A}_C \in \mathbb{R}^3$  represents a change in end-effector position.
- **Lift cup (3D)**: Use the tool to lift a cup of randomized geometry from the ground into the air. This task requires careful design of the tool to match cup geometry. The tool is a four-link fork with two prongs parameterized by the separation, tilt angle, width, length, and height of the prongs. The same parameters are applied to both prongs to maintain symmetry. The handle dimensions are fixed. The design space has  $n = 5$  parameters.  $\mathcal{A}_C \in \mathbb{R}^3$  represents a change in end-effector position.
- **Scoop (3D)**: A 3D analog of the 2D scoop task. This task has the same goal space as the 2D scoop task, but the tool in 3D is a six-link scoop composed of a rectangular bottom plate parameterized by its width and length, and four rectangular side plates attached to each side of the bottom plate. Each side plate is parameterized by its height and relative angle to the bottom plate. A handle with fixed dimensions is attached to one of the side plates. There are  $n = 10$  total design parameters.  $\mathcal{A}_C \in \mathbb{R}^6$  represents a change in end-effector pose.

## B Experimental Details

### B.1 Training Hyperparameters & Architecture Details for Our Framework

In Tables 5, 6, 7, 8, 9, and 10, we provide detailed hyperparameters for our framework for each environment. Unless otherwise specified, we use the neural network architectures for the design policy, control policy, and value function from [7].

### B.2 Training Hyperparameters & Architecture Details for Baselines

For the CMA-ES baseline, we perform hyperparameter sweeps for a fair comparison with our framework. For the CMA-RL baseline, we use the same set of best performing hyperparameters for the outer CMA-ES loop. The tested hyperparameter configurations for each baseline are listed in Table 2. Except model architecture differences, we use the same optimization hyperparameters for Ours, Ours(shared arch.), and HWasP-minimal.

### B.3 Generalization to Unseen Goals Experiment Details

For **Fetch cube**, the rectangular region of initial poses is defined by  $x \in [-0.395, 0.395]$  and  $y \in [0.4, 0.7]$ . The cutout region corresponds to two disconnected rectangular patches contained in

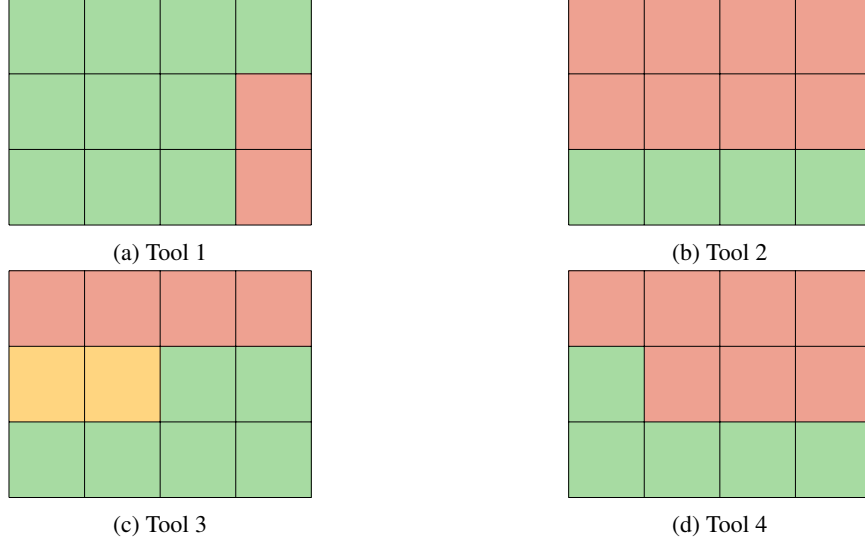

Figure 10: Heatmaps of success and failures for trials where fixed tools are used for a range of initializations. The grid here directly maps to the set of 2D initial cube locations tested for each tool, from the point of view of the robot. Here green indicates a success, red indicates failure, and orange indicates a failure where the final cube position is within 5cm of success.

| Method             | Hyperparameters          | Values                    |
|--------------------|--------------------------|---------------------------|
| CMA-ES             | Population Size          | 10, <b>24</b> , 100, 1000 |
|                    | Initial Stdev            | <b>0.1</b> , 1.0, 10.0    |
|                    | Center Learning Rate     | 0.01, 0.1, <b>1.0</b>     |
|                    | Covariance Learning Rate | 0.01, 0.1, <b>1.0</b>     |
|                    | Rank $\mu$ Learning Rate | 0.01, 0.1, <b>1.0</b>     |
|                    | Rank One Learning Rate   | 0.01, 0.1, <b>1.0</b>     |
| CMA-RL             | Poicy Net                | (256, 256, 256, 256, 256) |
|                    | Value Net                | (256, 256, 256, 256, 256) |
|                    | Learning Rate            | 3e-4                      |
|                    | Batch Size               | (50000, 20000(3D scoop))  |
|                    | Minibatch Size           | 2000                      |
| Ours(shared arch.) | Poicy Net                | (256, 256, 256, 256, 256) |
|                    | Value Net                | (256, 256, 256, 256, 256) |
|                    | Learning Rate            | 1e-4                      |
|                    | Batch Size               | (50000, 20000(3D scoop))  |
|                    | Minibatch Size           | 2000                      |

Table 2: We tune over these values for hyperparameters of baseline methods. Bolded values indicate the best performing settings for CMA-ES, which we use in our comparisons.

the training region defined by  $x_1 \in [-0.350, -0.045]$ ,  $y_1 \in [0.434, 0.666]$  and  $x_2 \in [0.045, 0.350]$ ,  $y_2 \in [0.434, 0.666]$  respectively.

**Zero-shot performance.** We train six policies using our framework where the cutout region removes a fraction of the total training area equal to 0.1, 0.2, 0.4, 0.6, 0.8, and 0.9 respectively.

**Fine-tuning performance.** For the fine-tuning experiment, we specifically select four initializations that we find our policies do not complete successfully zero-shot:  $\{(-0.167, 0.367), (-0.129, 0.357), (0.430, 0.493), (0.415, 0.610)\}$ .

#### 492 B.4 Trading off Design and Control Complexity Experiment Details

493 We train four agents independently on `catch balls`, setting the value of  $\alpha$ , the tradeoff reward  
 494 parameter defined in Equation 1, to 0, 0.3, 0.7, and 1.0 respectively.

#### 495 B.5 Real Robot Experiment Details

496 For our real-world experiments, we use a Franka Emika Panda arm. We control the robot using an  
 497 impedance controller from the Polymetis [38] library.

498 Tools are 3D printed using polylactic acid (PLA) on  
 499 commercially available Ender 3 and Ender 5 printers  
 500 with nozzle diameter 0.4mm. We print using a layer  
 501 height of 0.3mm and 10% infill. We perform slicing  
 502 using the Ultimaker CURA software.

503 We roll out each policy for 100 environment steps or  
 504 until a success is detected.

505 For the `fetch cube` task, we measure the success  
 506 based on whether the center of mass of the 5cm cube  
 507 is closer than 0.5m from the base of the robot. Please  
 508 see Table 3 for per-tool details. The tool images are  
 509 shown in Figure 9, from left to right: Tools 4, 2, 3, 1  
 510 respectively.

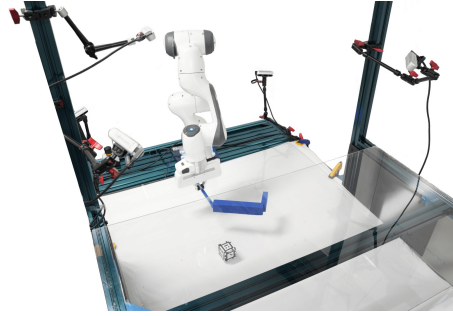

Figure 11: Real world setup. We use a Franka Panda arm and five RealSense D435 cameras for tracking.

| Tool   | Initial cube position (x, y, z) |
|--------|---------------------------------|
| Tool 1 | (-0.110, -0.803, 0.025)         |
| Tool 2 | (-0.339, -0.588, 0.025)         |
| Tool 3 | (0.155, -0.731, 0.025)          |
| Tool 4 | (0.211, -0.633, 0.025)          |

Table 3: Initial cube positions corresponding to tools fabricated in real experiments.

511 For the `lift cup` task, we measure success based on whether the cup has been lifted higher than  
 512 0.4m off of the plane of the workspace. Please see Table 4 for per-tool details. The tool images are  
 513 shown in Figure 9, from left to right: Tools 1, 2, 3, 4.

| Tool   | Cup geometry parameters<br>(length/width, height) |
|--------|---------------------------------------------------|
| Tool 1 | (0.3, 0.6)                                        |
| Tool 2 | (0.3, 0.9)                                        |
| Tool 3 | (0.5, 0.8)                                        |
| Tool 4 | (0.9, 0.6)                                        |

Table 4: Cup geometry parameters corresponding to tools fabricated in real experiments. Note that the length and width parameters share a single value.

514 We also present detailed results for the `fetch cube` experiments using tools generated for a specific  
 515 initial position for a range of initializations. Recall that we test the policies on a  $3 \times 4$  grid of initial  
 516 positions that span a range of  $12\text{cm} \times 85.6\text{cm}$ , for a total of 12 trials per tool. We plot the successes  
 517 and failures for each tool according to geometric position in Figure 10. We can see that the control  
 518 policy is able to use each tool to solve the task for several initializations, but each tool is specialized  
 519 for particular regions.

| Hyperparameter            | Value           |
|---------------------------|-----------------|
| Tool Position Init.       | (20, 10)        |
| Control Steps Per Action  | 1               |
| Max Episode Steps         | 150             |
| Slack Reward              | -0.001          |
| Tool Length Ratio         | (-0.5, 0.5)     |
| Tool Length Init.         | (2.0, 2.0, 2.0) |
| Tool Angle Init.          | (0.0, 0.0, 0.0) |
| Tool Angle Ratio          | (-1.0, 1.0)     |
| Tool Angle Scale          | 90.0            |
| Control GNN               | (64, 64, 64)    |
| Control Index MLP         | (128, 128)      |
| Design GNN                | (64, 64, 64)    |
| Design Index MLP          | (128, 128)      |
| Control Log Std.          | -1.0            |
| Design Log Std.           | -2.3            |
| Fix Design & Control Std. | True            |
| Policy Learning Rate      | 2e-5            |
| Entropy $\beta$           | 0.01            |
| Value Learning Rate       | 1e-4            |
| KL Divergence Threshold   | 0.005           |
| Batch Size                | 50000           |
| Minibatch Size            | 2000            |
| PPO Steps Per Batch       | 10              |

Table 5: Hyperparameters used for our framework on the push task.

| Hyperparameter            | Value           |
|---------------------------|-----------------|
| Tool Position Init.       | (20, 10)        |
| Control Steps Per Action  | 1               |
| Max Episode Steps         | 150             |
| Slack Reward              | -0.001          |
| Tool Length Ratio         | (-0.5, 2.0)     |
| Tool Length Init.         | (2.0, 1.0, 1.0) |
| Tool Angle Init.          | (0.0, 0.0, 0.0) |
| Tool Angle Ratio          | (-1.0, 1.0)     |
| Tool Angle Scale          | 60.0            |
| Control GNN               | (64, 64, 64)    |
| Control Index MLP         | (128, 128)      |
| Design GNN                | (64, 64, 64)    |
| Design Index MLP          | (128, 128)      |
| Control Log Std.          | 0.0             |
| Design Log Std.           | 0.0             |
| Fix Design & Control Std. | True            |
| Policy Learning Rate      | 2e-5            |
| Entropy $\beta$           | 0.01            |
| Value Learning Rate       | 1e-4            |
| KL Divergence Threshold   | 0.002           |
| Batch Size                | 50000           |
| Minibatch Size            | 2000            |
| PPO Steps Per Batch       | 10              |

Table 6: Hyperparameters used for our framework on the catch balls task.

| Hyperparameter            | Value           |
|---------------------------|-----------------|
| Tool Position Init.       | (15, 10)        |
| Control Steps Per Action  | 5               |
| Max Episode Steps         | 30              |
| Slack Reward              | -0.001          |
| Tool Length Ratio         | (-0.7, 0.2)     |
| Tool Length Init.         | (6.0, 3.0, 3.0) |
| Tool Angle Init.          | (0.0, 0.0, 0.0) |
| Tool Angle Ratio          | (-0.1, 0.7)     |
| Tool Angle Scale          | 90.0            |
| Control GNN               | (64, 64, 64)    |
| Control Index MLP         | (128, 128)      |
| Design GNN                | (64, 64, 64)    |
| Design Index MLP          | (128, 128)      |
| Control Log Std.          | 0.0             |
| Design Log Std.           | 0.0             |
| Fix Design & Control Std. | True            |
| Policy Learning Rate      | 2e-5            |
| Entropy $\beta$           | 0.01            |
| Value Learning Rate       | 3e-4            |
| KL Divergence Threshold   | 0.1             |
| Batch Size                | 50000           |
| Minibatch Size            | 2000            |
| PPO Steps Per Batch       | 10              |

Table 7: Hyperparameters used for our framework on the `scoop` task.

| Hyperparameter            | Value                                |
|---------------------------|--------------------------------------|
| Tool Position Init.       | (0.0, 0.5, 0.02)                     |
| Control Steps Per Action  | 10                                   |
| Max Episode Steps         | 100                                  |
| Slack Reward              | -0.001                               |
| Success Reward            | 10.0                                 |
| Box Dimensions Min        | (0.005, 0.05, 0.005)                 |
| Box Dimensions Max        | (0.015, 0.1, 0.02)                   |
| Tool Angle Min            | (-90.0, -90.0, -90.0)                |
| Tool Angle Max            | (90.0, 90.0, 90.0)                   |
| Control Action Min        | (-1.0, -1.0, -1.0, -0.2, -0.2, -0.2) |
| Control Action Max        | (1.0, 1.0, 1.0, 0.2, 0.2, 0.2)       |
| Control Action Scale      | 0.1                                  |
| Control GNN               | (128, 128, 128)                      |
| Control Index MLP         | (128, 128)                           |
| Design GNN                | (128, 128, 128)                      |
| Design Index MLP          | (128, 128)                           |
| Control Log Std.          | 0.0                                  |
| Design Log Std.           | 0.0                                  |
| Fix Design & Control Std. | False                                |
| Policy Learning Rate      | 1e-4                                 |
| Entropy $\beta$           | 0.0                                  |
| Value Learning Rate       | 3e-4                                 |
| KL Divergence Threshold   | 0.5                                  |
| Batch Size                | 50000                                |
| Minibatch Size            | 2000                                 |
| PPO Steps Per Batch       | 10                                   |

Table 8: Hyperparameters used for our framework on the `fetch_cube` task.

| Hyperparameter            | Value                                   |
|---------------------------|-----------------------------------------|
| Tool Position Init.       | (0.0, 1.2, 0.05)                        |
| Control Steps Per Action  | 10                                      |
| Max Episode Steps         | 150                                     |
| Slack Reward              | -0.001                                  |
| Success Reward            | 10.0                                    |
| Box Dimensions Min        | (0.005, 0.02, 0.01)                     |
| Box Dimensions Max        | (0.01, 0.1, 0.03)                       |
| Tool Angle Min            | (-30.0, -30.0, -30.0)                   |
| Tool Angle Max            | (30.0, 30.0, 30.0)                      |
| Control Action Min        | (-1.0, -1.0, -1.0, -1.57, -1.57, -1.57) |
| Control Action Max        | (1.0, 1.0, 1.0, 1.57, 1.57, 1.57)       |
| Control Action Scale      | 0.1                                     |
| Control GNN               | (128, 128, 128)                         |
| Control Index MLP         | (128, 128)                              |
| Design GNN                | (128, 128, 128)                         |
| Design Index MLP          | (128, 128)                              |
| Control Log Std.          | 0.0                                     |
| Design Log Std.           | -1.0                                    |
| Fix Design & Control Std. | True                                    |
| Policy Learning Rate      | 2e-5                                    |
| Entropy $\beta$           | 0.01                                    |
| Value Learning Rate       | 3e-4                                    |
| KL Divergence Threshold   | 0.5                                     |
| Batch Size                | 50000                                   |
| Minibatch Size            | 2000                                    |
| PPO Steps Per Batch       | 5                                       |

Table 9: Hyperparameters used for our framework on the `lift_cup` task.

| Hyperparameter            | Value                                   |
|---------------------------|-----------------------------------------|
| Tool Position Init.       | (0.0, 0.05, 0.1)                        |
| Control Steps Per Action  | 10                                      |
| Max Episode Steps         | 100                                     |
| Slack Reward              | -0.001                                  |
| Success Reward            | 10.0                                    |
| Box Dimensions Min        | (0.04, 0.005, 0.02)                     |
| Box Dimensions Max        | (0.08, 0.005, 0.05)                     |
| Tool Angle Min            | (-15.0, -15.0, -15.0)                   |
| Tool Angle Max            | (15.0, 15.0, 15.0)                      |
| Control Action Min        | (-1.0, -1.0, -1.0, -1.57, -1.57, -1.57) |
| Control Action Max        | (1.0, 1.0, 1.0, 1.57, 1.57, 1.57)       |
| Control Action Scale      | 0.05                                    |
| Control GNN               | (128, 128, 128)                         |
| Control Index MLP         | (128, 128)                              |
| Design GNN                | (128, 128, 128)                         |
| Design Index MLP          | (128, 128)                              |
| Control Log Std.          | 0.0                                     |
| Design Log Std.           | 0.0                                     |
| Fix Design & Control Std. | False                                   |
| Policy Learning Rate      | 1e-4                                    |
| Entropy $\beta$           | 0.01                                    |
| Value Learning Rate       | 3e-4                                    |
| KL Divergence Threshold   | 0.5                                     |
| Batch Size                | 20000                                   |
| Minibatch Size            | 2000                                    |
| PPO Steps Per Batch       | 5                                       |

Table 10: Hyperparameters used for our framework on the 3D scoop task.
